# Supplementary material for: Using human factors and ergonomics principles to prevent inpatient falls
Source: PubMed Central journal article supplement — BMJ Open Qual. 2022 Mar 23;11(1):e001696. doi: 10.1136/bmjoq-2021-001696 (PMC8943775; doi:10.1136/bmjoq-2021-001696), 2022-03-23
Supplement: bmjoq-2021-001696supp001.pdf [file bmjoq-2021-001696supp001.pdf]

**Table 1: Identified fall risks, actions taken and human factors and ergonomics knowledge areas applied on fall preventive interventions**

| Framework Category | Observation / Contributory Factor                                                          | Associated Fall Risk Identified by the Team in Retrospective Falls Analysis and Fall Visits                                           | Action Taken                                                                                                                                                                                                | Human Factors & Ergonomics Knowledge Area Applied                        |
|--------------------|--------------------------------------------------------------------------------------------|---------------------------------------------------------------------------------------------------------------------------------------|-------------------------------------------------------------------------------------------------------------------------------------------------------------------------------------------------------------|--------------------------------------------------------------------------|
| Assessment         | <b>1) Patient history</b>                                                                  |                                                                                                                                       |                                                                                                                                                                                                             |                                                                          |
|                    | Staff did not realise that patients had history of recent falls                            | Necessary fall preventive measures were not activated as they were assessed as low fall risk instead of high fall risk                | <ul style="list-style-type: none"> <li>Advised staff to document fall history in patient records</li> <li>Advised staff to clarify with old age homes or relatives about the recent fall history</li> </ul> | Situation awareness, process analysis, communication                     |
| Monitoring         | <b>2) Distance</b>                                                                         |                                                                                                                                       |                                                                                                                                                                                                             |                                                                          |
|                    | Patients with poor mobility or high fall risk were allocated to beds far away from toilets | Patients had to walk a long distance to the toilets                                                                                   | Advised nurses to allocate patients with poor mobility or high fall risk to beds nearer to the toilets or provide staff assistance                                                                          | Job design                                                               |
|                    | <b>3) Bed alarm mats</b>                                                                   |                                                                                                                                       |                                                                                                                                                                                                             |                                                                          |
|                    | There were no suggested criteria for application of bed alarm mats                         | Staff had to use their personal judgment to identify which patients could be applied with bed alarm mats                              | Developed criteria on the use of bed alarm mats for high fall risk patients                                                                                                                                 | Decision making, job design                                              |
|                    | Inadequate quantity of bed alarm mats in wards                                             | Staff tended not to apply bed alarm mats as they perceived the mats might have to be applied for other patients with higher fall risk | Conducted a stock take exercise on bed alarm mats quantity and increased the stock level in each ward                                                                                                       | Perception, decision making                                              |
| Communication      | <b>4) Call bell system</b>                                                                 |                                                                                                                                       |                                                                                                                                                                                                             |                                                                          |
|                    | Not all beds and toilets were installed with a call bell system                            | Patient could not seek help from staff promptly and had to leave their beds or the toilet to seek for help                            | Installed standard call bell systems in all beds and patient toilets                                                                                                                                        | Perception, behaviour and attitudes, environmental design                |
|                    | <b>5) Intercom</b>                                                                         |                                                                                                                                       |                                                                                                                                                                                                             |                                                                          |
|                    | Staff could not initiate communication with patients in isolation rooms                    | Patients might leave their beds to seek for help                                                                                      | Installed intercom facilities in isolation rooms so that staff could proactively talk to patients to address their needs                                                                                    | Perception, behaviour and attitudes, environment design, user experience |

| Framework Category                                    | Observation / Contributory Factor                                                                                               | Associated Fall Risk Identified by the Team in Retrospective Falls Analysis and Fall Visits                                  | Action Taken                                                                                                | Human Factors & Ergonomics Knowledge Area Applied |
|-------------------------------------------------------|---------------------------------------------------------------------------------------------------------------------------------|------------------------------------------------------------------------------------------------------------------------------|-------------------------------------------------------------------------------------------------------------|---------------------------------------------------|
| <b>Communication (cont'd)</b>                         | <b>6) Patient education</b>                                                                                                     |                                                                                                                              |                                                                                                             |                                                   |
|                                                       | Falls education pamphlets were only distributed to high fall risk patients                                                      | Patients with low fall risk might not know about the fall preventive measures and did not know they were also prone to falls | Distributed fall prevention education pamphlets to all hospitalised patients (excluded bed-bound patients)  | Perception, behaviour and attitudes               |
|                                                       | The patient education poster for proper shoe wear was only available as an A3 poster which was stuck on ward notice board       | The poster was not on the line of sight that patients generally would not read the information                               | Revised the fall prevention education pamphlets to include information of 'proper shoe wear'                | Attention                                         |
| <b>Patients</b>                                       | <b>7) Strength/balance</b>                                                                                                      |                                                                                                                              |                                                                                                             |                                                   |
|                                                       | Patients picked items on the floor or got their items from their personal lockers in squatting position without asking for help | Patients did not realise that squatting is a risk factor of falls and their mobility might be reduced                        | Conducted a programme on bedside activities training by occupational therapists for high fall risk patients | Perception, behaviour and attitudes, job design   |
| <b>Environment and Equipment</b>                      | <b>8) Ward environment</b>                                                                                                      |                                                                                                                              |                                                                                                             |                                                   |
|                                                       | High colour contrast of floor pattern in wards                                                                                  | Patients might perceive as level changes                                                                                     | Replaced flooring with monotone pattern during ward renovation                                              | Perception, visual environment                    |
|                                                       | Mobile screens were placed in the ward corridors                                                                                | The legs of the mobile screens might cause tripping                                                                          | Removed all mobile screens from the corridors and only use them when necessary                              | Product design, environmental design              |
|                                                       | <b>9) Patient toilet</b>                                                                                                        |                                                                                                                              |                                                                                                             |                                                   |
|                                                       | The toilet cubicle size was too small for patients with walking aids                                                            | Patients with walking frame might fall when performing turning                                                               | Enlarged toilet cubicle size by conducting anthropometric measurements by occupational therapists           | Anthropometrics, environmental design             |
|                                                       | Inadequate amount of grab bars for patients to hold in hand washing area of patient toilets                                     | Patients had no aids to hold when they attempted to fall                                                                     | Installed more grab bars in hand washing area of patient toilets                                            | Environmental design                              |
| No seats to allow patients to rest in patient toilets | Patients would easily fall when they felt unwell                                                                                | Installed benches in patient toilets                                                                                         | Environmental design                                                                                        |                                                   |

| Framework Category                                                                                 | Observation / Contributory Factor                                                                                                                                       | Associated Fall Risk Identified by the Team in Retrospective Falls Analysis and Fall Visits                            | Action Taken                                                                                                 | Human Factors & Ergonomics Knowledge Area Applied |
|----------------------------------------------------------------------------------------------------|-------------------------------------------------------------------------------------------------------------------------------------------------------------------------|------------------------------------------------------------------------------------------------------------------------|--------------------------------------------------------------------------------------------------------------|---------------------------------------------------|
| <b>Environment and Equipment (cont'd)</b>                                                          | <b>10) Weighing scale</b>                                                                                                                                               |                                                                                                                        |                                                                                                              |                                                   |
|                                                                                                    | No handrail was installed at weighing scales                                                                                                                            | Patients might fall when stepping up or down the weighing scales                                                       | Installed handrail devices at weighing scales                                                                | Product design, user centred design               |
|                                                                                                    | <b>11) Geriatric chair</b>                                                                                                                                              |                                                                                                                        |                                                                                                              |                                                   |
|                                                                                                    | Safety belts of geriatric chairs could not effectively prevent falls                                                                                                    | Patients could easily slip out from the geriatric chairs                                                               | Changed to use pelvic belts to offer better protection                                                       | Product design, user centred design               |
|                                                                                                    | <b>12) Safety vest (applied only as last resort when all alternatives were considered not feasible according to the hospital fall prevention and management policy)</b> |                                                                                                                        |                                                                                                              |                                                   |
| Inadequate quantity and inappropriate sizes of safety vests were supplied to wards                 | Staff had no safety vest to use or had to apply a wrong size of safety vest                                                                                             | Worked with Linen Unit to review the supply of safety vests and conducted snap shot audits to ensure compliance        | Job design, evaluation of work activities                                                                    |                                                   |
| Staff did not know the dimensions and meanings of colour strips of different sizes of safety vests | Staff based on their perception to pick a safety vest for patients                                                                                                      | Developed a cue card and stuck on the line of sight of storage cabinet to facilitate staff in picking the correct size | Anthropometrics, perception, user experience                                                                 |                                                   |
| <b>Organisation</b>                                                                                | <b>13) Fall prevention and management</b>                                                                                                                               |                                                                                                                        |                                                                                                              |                                                   |
|                                                                                                    | Local falls were mainly managed by nurses only                                                                                                                          | There was no input from other professions                                                                              | Formed a Falls Review Team with members from various disciplines to review falls from different perspectives | Organisational learning, safety culture           |
|                                                                                                    | Only falls with severe injuries, e.g. fracture, were reviewed and visited                                                                                               | There was no prompt evaluation of falls with minor injuries                                                            | All falls including severe and minor injuries were visited on the day of fall or the next working day        | Organisational learning, safety culture           |
| No proactive fall risk assessment from hospital management                                         | The design of environment, equipment and workflow was not assessed to prevent falls                                                                                     | Proactively visited wards (both in service and under renovation) to assess the equipment and environmental design      | Organisational learning, safety culture, environmental design, product design, process analysis              |                                                   |
